# Supplementary material for: Immunization With Bovine Herpesvirus-4-Based Vector Delivering PPRV-H Protein Protects Sheep From PPRV Challenge
Source: PubMed Central journal article supplement (PMC8476865; doi:10.3389/fimmu.2021.705539), 2021-09-14

# Supplementary Figure S2

OFLs expansion in the presence of 10% of FBS.

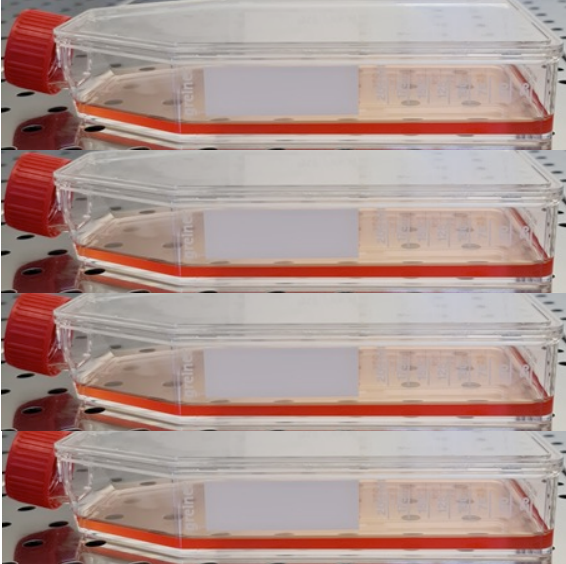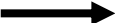

OFLs infection with 0.5 M.O.I. of vector in the presence of 2% of Sheep serum (SS).

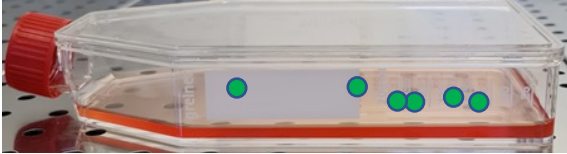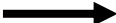

Three hours post infection medium was replaced with medium containing 10% of SS and left for 48 hours or till CPE appearance.

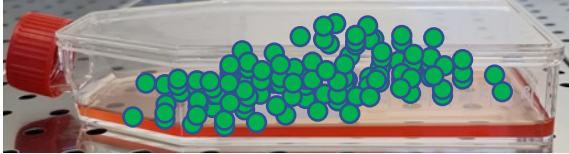

Freeze/thaw the flasks, harvesting and aliquoting the supernatant and titering the vector.

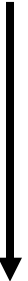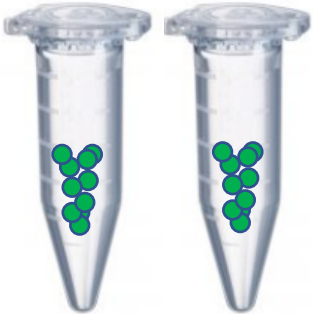

Direct injection

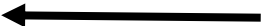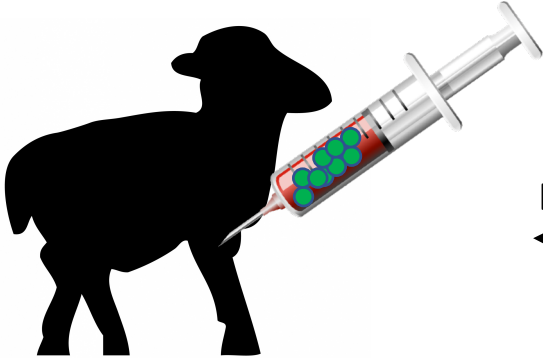

Supplement: Image_2.pdf [file Image_2.pdf]
